# Supplementary material for: Series to parallel structure of electrode fiber: an effective method to remarkably reduce inner resistance of triboelectric nanogenerator textiles
Source: Royal Society of Chemistry journal article supplement (doi:10.1039/d1ta01309b), 2021-01-01
Supplement: d1ta01309b3.pdf [file d1ta01309b3.pdf]

## Supporting Information

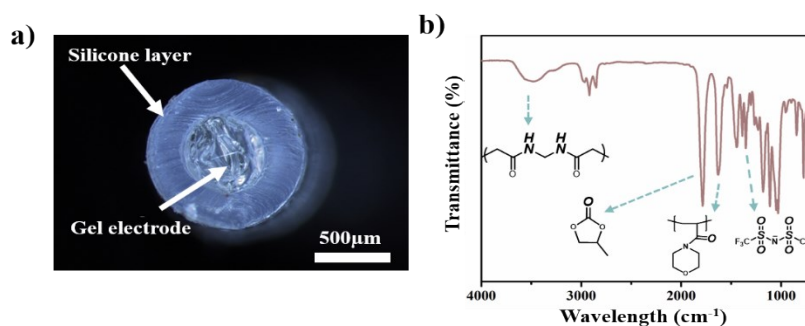

Figure S1. a) Cross-section imaging of GS-fiber by optical microscope. The scale bar was 500 μm. b) FTIR of organogel electrode and corresponding characteristic band.

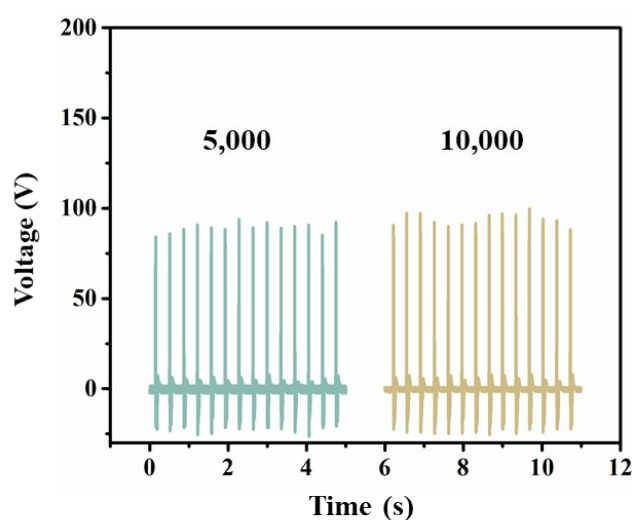

Figure S2. Output voltages of Parallel-teng after different contact-separation cycles.

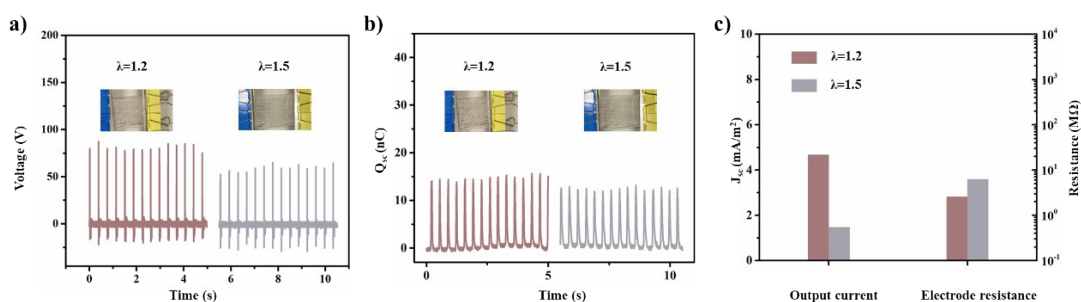

Figure S3. The a) output voltages, b)  $Q_{sc}$  and c)  $J_{sc}$ , electrode resistances of Parallel-teng at stretching states.  $\lambda$  was the ratio of the fabric length at stretching states vs original state in warp fibers direction.



---

|                      |      |         |            |             |            |            |     |     |            |
|----------------------|------|---------|------------|-------------|------------|------------|-----|-----|------------|
| <b>Parallel-teng</b> | 92 V | 24.8 nC | <b>1.2</b> | <b>5.84</b> | <b>10</b>  | <b>187</b> | 634 | 231 | 44         |
| <b>GS-teng</b>       | 40 V | 9.8 nC  | <b>324</b> | <b>0.49</b> | <b>300</b> | <b>42</b>  | 213 | 32  | <b>Non</b> |

---
